# Supplementary material for: Cytotoxic Properties of C17 Polyacetylenes from the Fresh Roots of Panax ginseng on Human Epithelial Ovarian Cancer Cells
Source: MDPI journal article supplement (doi:10.3390/molecules27207027), 2022-10-18
Supplement: s1 [file s1]

# Supporting information

## Contents

- Figure S1.** HR-DART-MS spectrum of compound **1**
- Figure S2.**  $^1\text{H}$  NMR spectrum of compound **1** (500 MHz, chloroform-*d*)
- Figure S3.**  $^{13}\text{C}$  NMR spectrum of compound **1** (200 MHz, chloroform-*d*)
- Figure S4.**  $^1\text{H}$   $^{13}\text{C}$  HSQC spectrum of compound **1**
- Figure S5.**  $^1\text{H}$   $^1\text{H}$  COSY spectrum of compound **1**
- Figure S6.**  $^1\text{H}$   $^{13}\text{C}$  HMBC spectrum of compound **1**
- Figure S7.**  $^1\text{H}$   $^1\text{H}$  NOESY spectrum of compound **1**
- Figure S8.** HR-DART-MS spectrum of compound **2**
- Figure S9.**  $^1\text{H}$  NMR spectrum of compound **2** (500 MHz, chloroform-*d*)
- Figure S10.** DEPT NMR spectrum of compound **2** (125 MHz, chloroform-*d*)
- Figure S11.**  $^1\text{H}$   $^1\text{H}$  COSY spectrum of compound **2**
- Figure S12.**  $^1\text{H}$   $^{13}\text{C}$  HMBC spectrum of compound **2**
- Figure S13.**  $^1\text{H}$   $^1\text{H}$  NOESY spectrum of compound **2**
- Figure S14.** HR-DART-MS spectrum of compound **3**
- Figure S15.**  $^1\text{H}$  NMR spectrum of compound **3** (500 MHz, chloroform-*d*)
- Figure S16.**  $^{13}\text{C}$  NMR spectrum of compound **3** (125 MHz, chloroform-*d*)
- Figure S17.**  $^1\text{H}$   $^{13}\text{C}$  HSQC spectrum of compound **3**
- Figure S18.**  $^1\text{H}$   $^1\text{H}$  COSY spectrum of compound **3**
- Figure S19.**  $^1\text{H}$   $^{13}\text{C}$  HMBC spectrum of compound **3**
- Figure S20.**  $^1\text{H}$   $^1\text{H}$  NOESY spectrum of compound **3**
- Figure S21.** HR-DART-MS spectrum of compound **4**
- Figure S22.**  $^1\text{H}$  NMR spectrum of compound **4** (500 MHz, chloroform-*d*)
- Figure S23.**  $^{13}\text{C}$  NMR spectrum of compound **4** (125 MHz, chloroform-*d*)
- Figure S24.**  $^1\text{H}$   $^{13}\text{C}$  HSQC spectrum of compound **4**
- Figure S25.**  $^1\text{H}$   $^1\text{H}$  COSY spectrum of compound **4**
- Figure S26.**  $^1\text{H}$   $^{13}\text{C}$  HMBC spectrum of compound **4**
- Figure S27.**  $^1\text{H}$   $^1\text{H}$  NOESY spectrum of compound **4**

**Figure S28.**  $^1\text{H}$  NMR spectra of compounds **11** and **4a**

**Figure S29.** The effects of compounds **1–2**, **4**, **6–7**, **9–13**, and **15–16** on cell viability in epithelial ovarian cancer cells A2780

**Figure S30.** The effects of compounds **6**, **11**, and **15** on cell viability in epithelial ovarian cancer cells SKOV3

**Table S1.** Experimental and calculated specific rotation data of **1** and **2**

**Table S2.** The cytotoxicity of compounds **6**, **11**, and **15** isolated from *P. ginseng* in RAW264.7 macrophages

**Figure S1.** HR-DART-MS spectrum of compound **1**

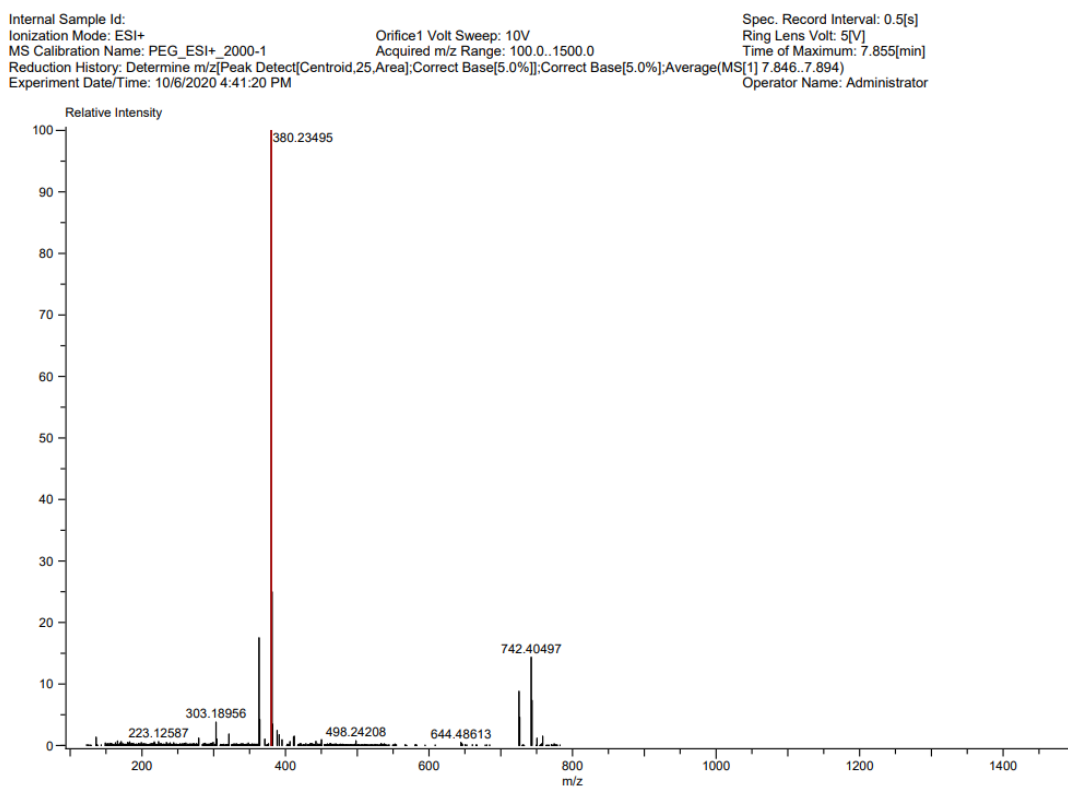

**Figure S2.**  $^1\text{H}$  NMR spectrum of compound **1** (500 MHz, chloroform- $d$ )

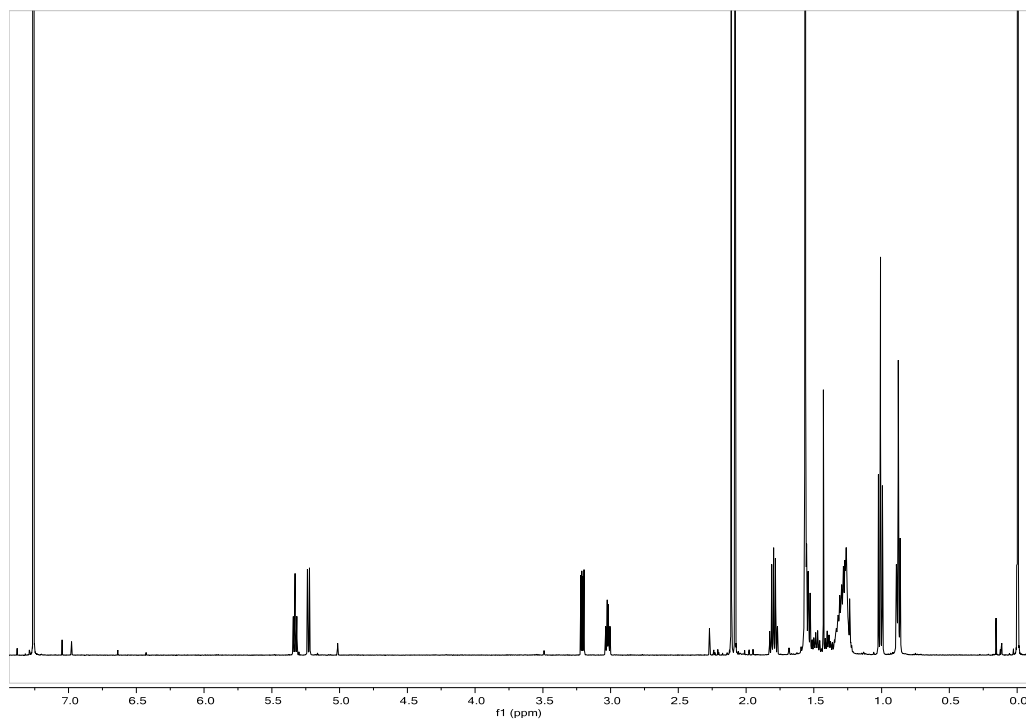

**Figure S3.**  $^{13}\text{C}$  NMR spectrum of compound **1** (200 MHz, chloroform- $d$ )

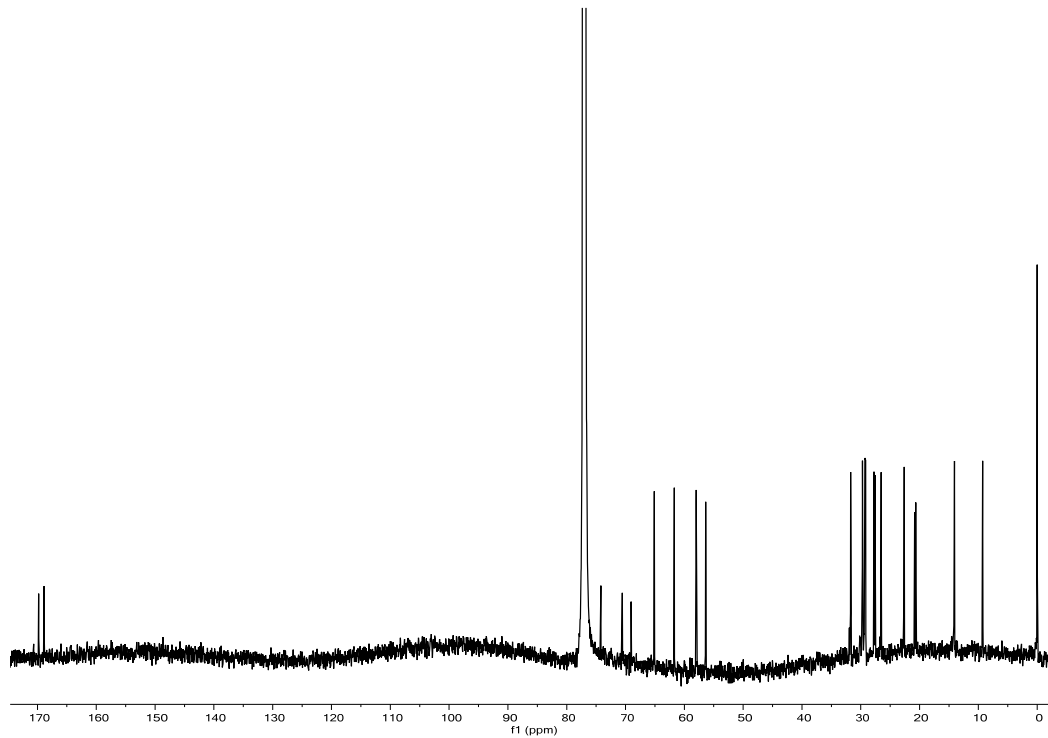

**Figure S4**  $^1\text{H}$   $^{13}\text{C}$  HSQC spectrum of compound **1**

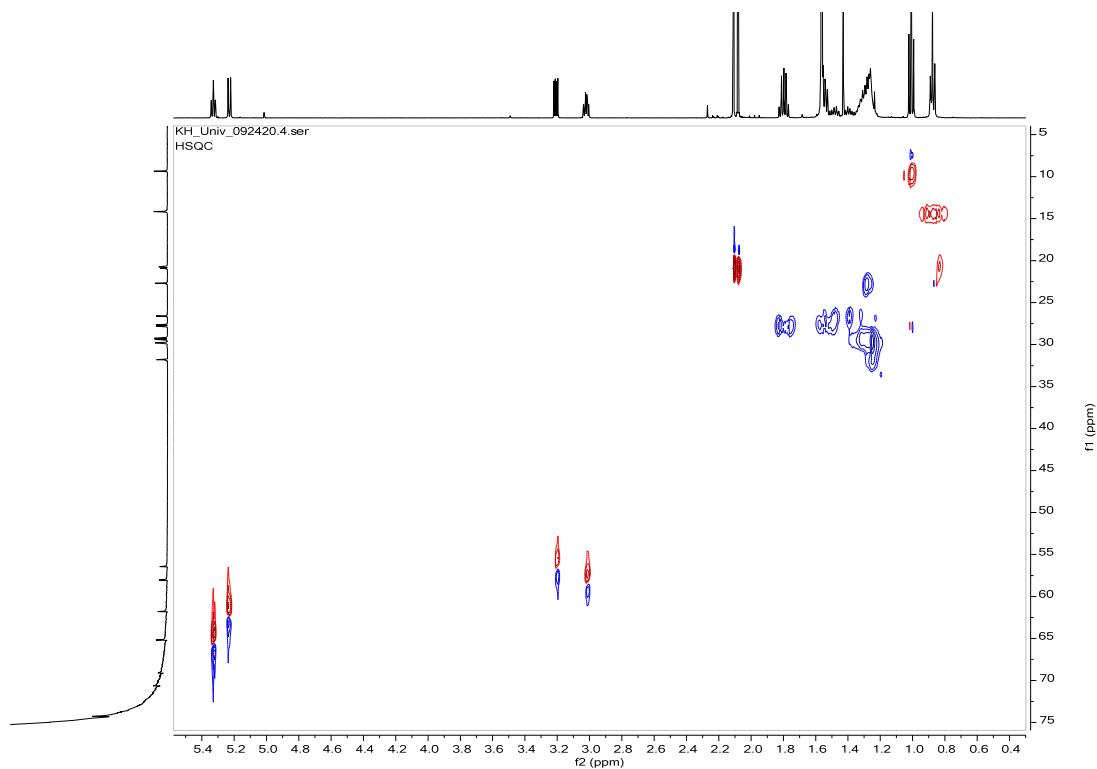



**Figure S7.**  $^1\text{H}$   $^1\text{H}$  NOESY spectrum of compound **1**

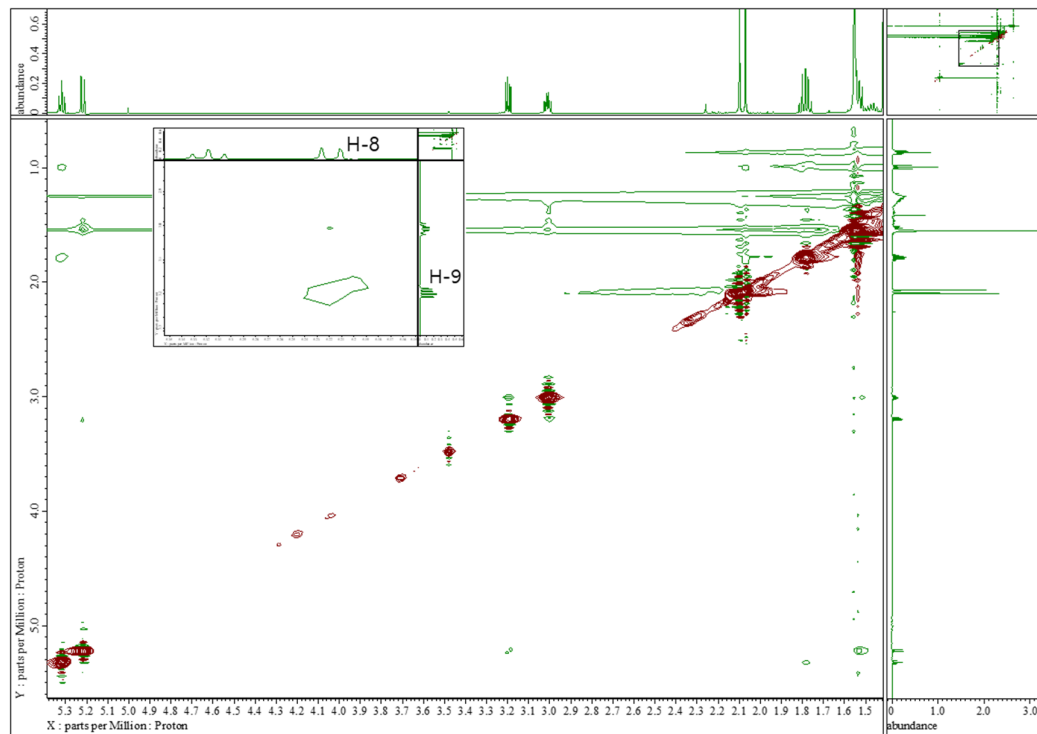

**Figure S8.** HR-DART-MS spectrum of compound **2**

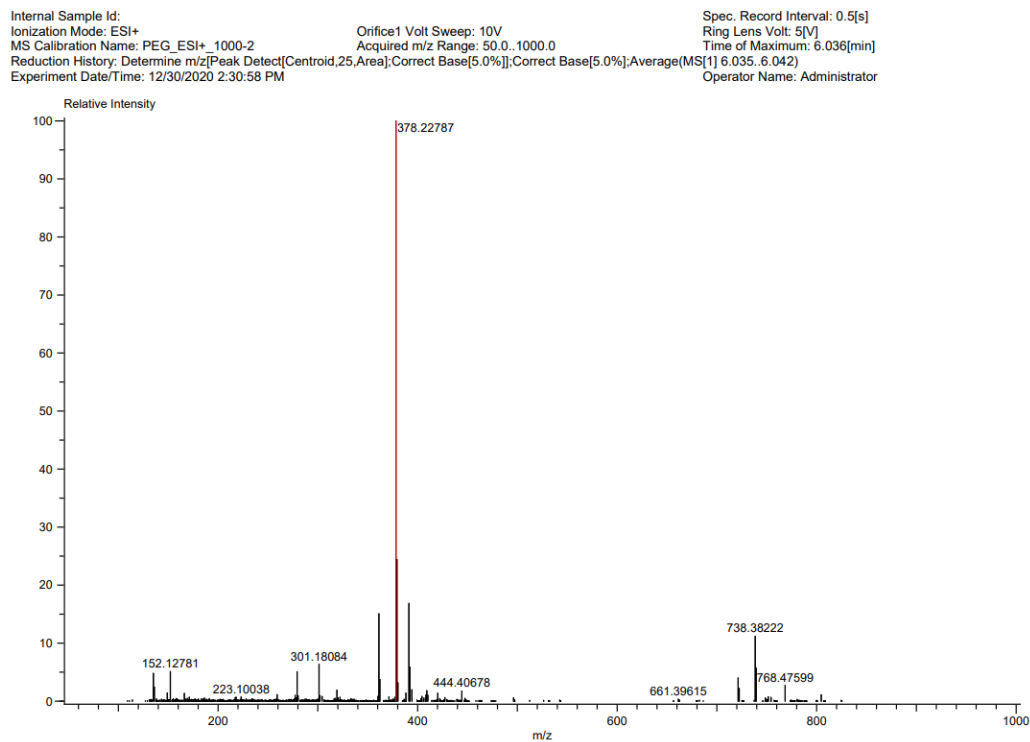

**Figure S9.**  $^1\text{H}$  NMR spectrum of compound **2** (500 MHz, chloroform-*d*)

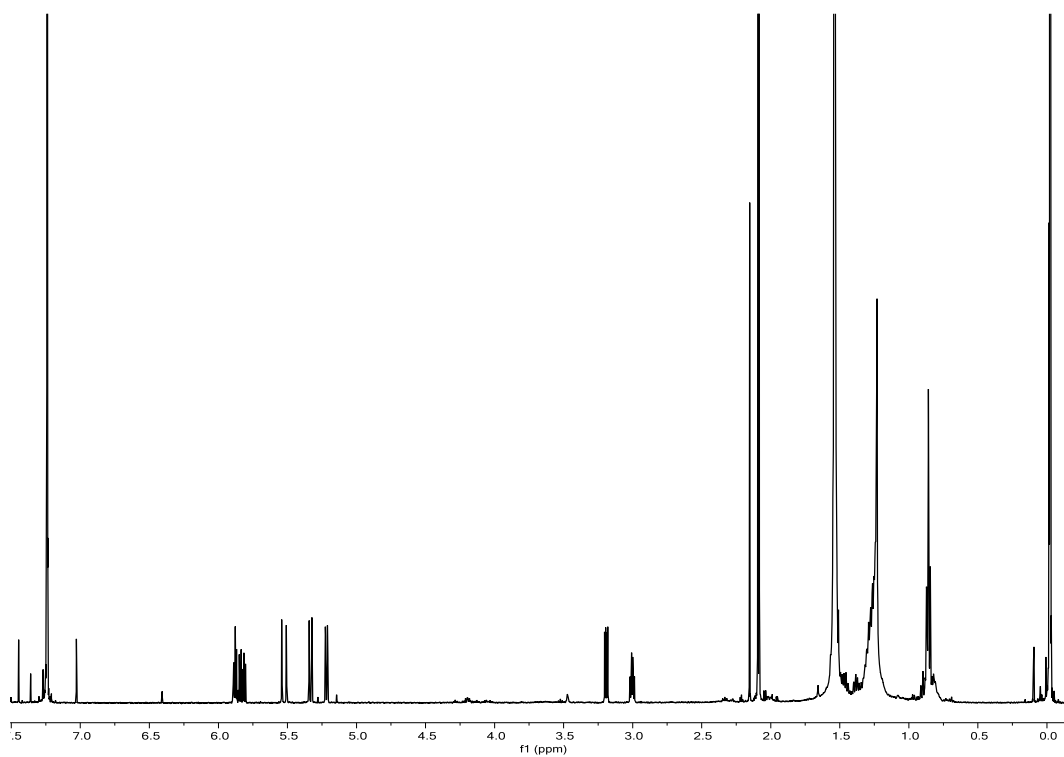

**Figure S10.** DEPT NMR spectrum of compound **2** (125 MHz, chloroform-*d*)

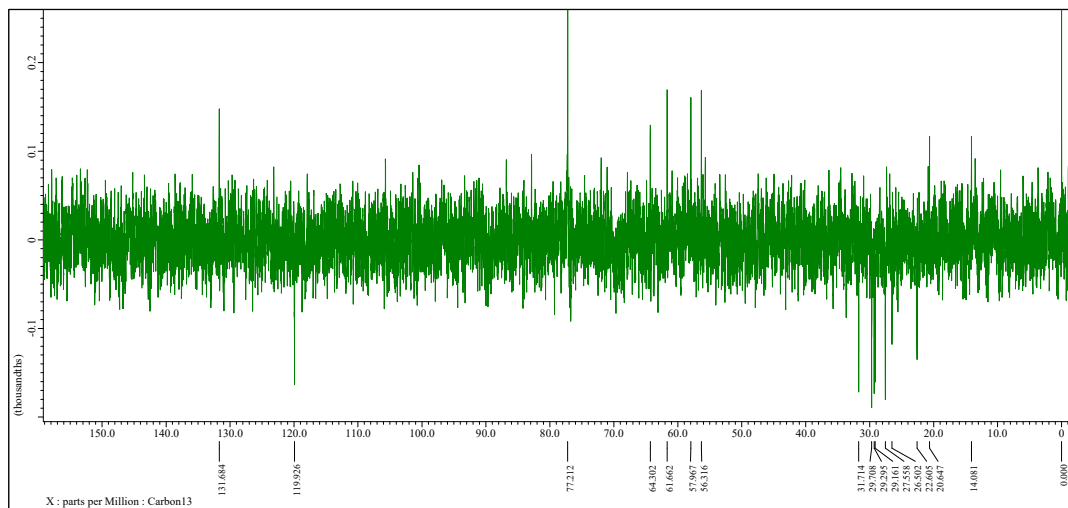

**Figure S11.**  $^1\text{H}$   $^1\text{H}$  COSY spectrum of compound **2**

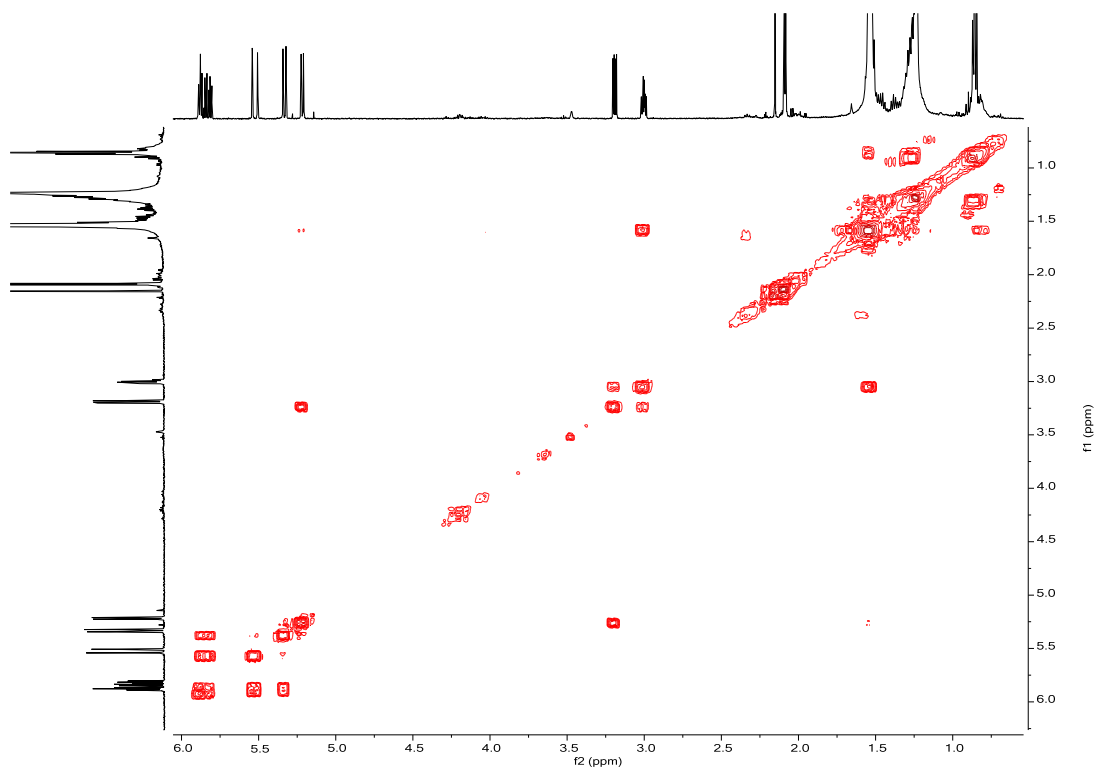

**Figure S12.**  $^1\text{H}$   $^{13}\text{C}$  HMBC spectrum of compound **2**

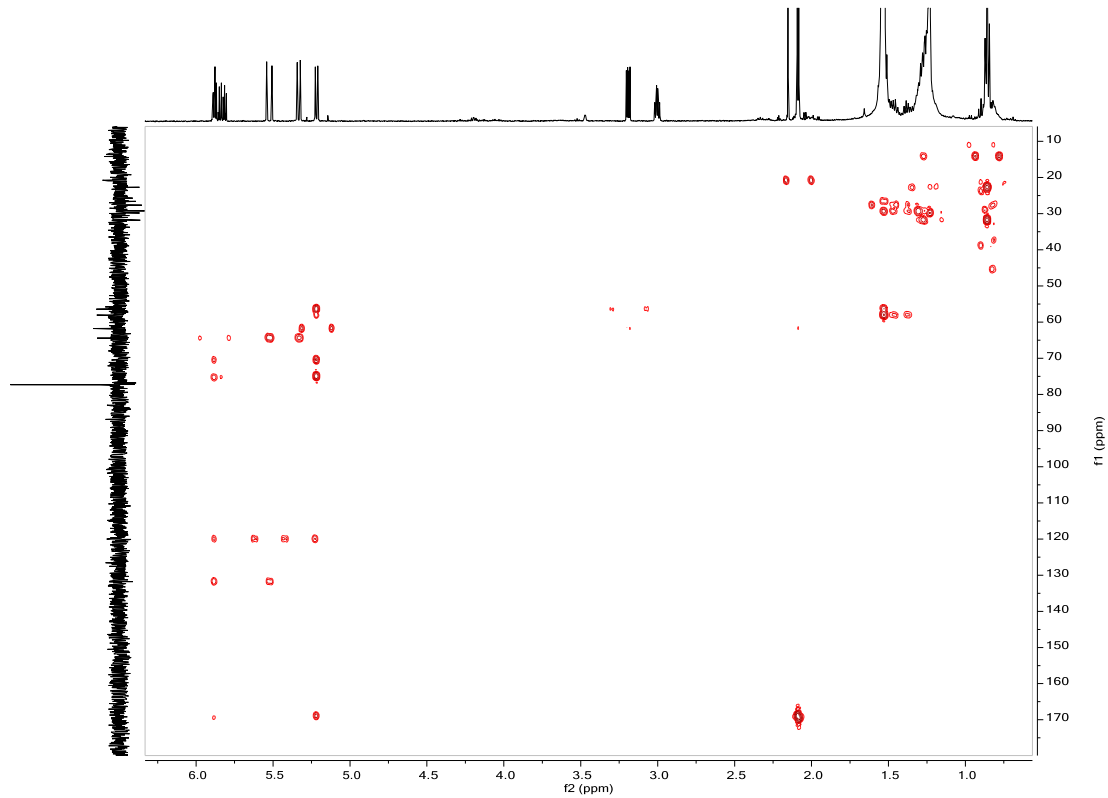

**Figure S13.**  $^1\text{H}$   $^1\text{H}$  NOESY spectrum of compound **2**

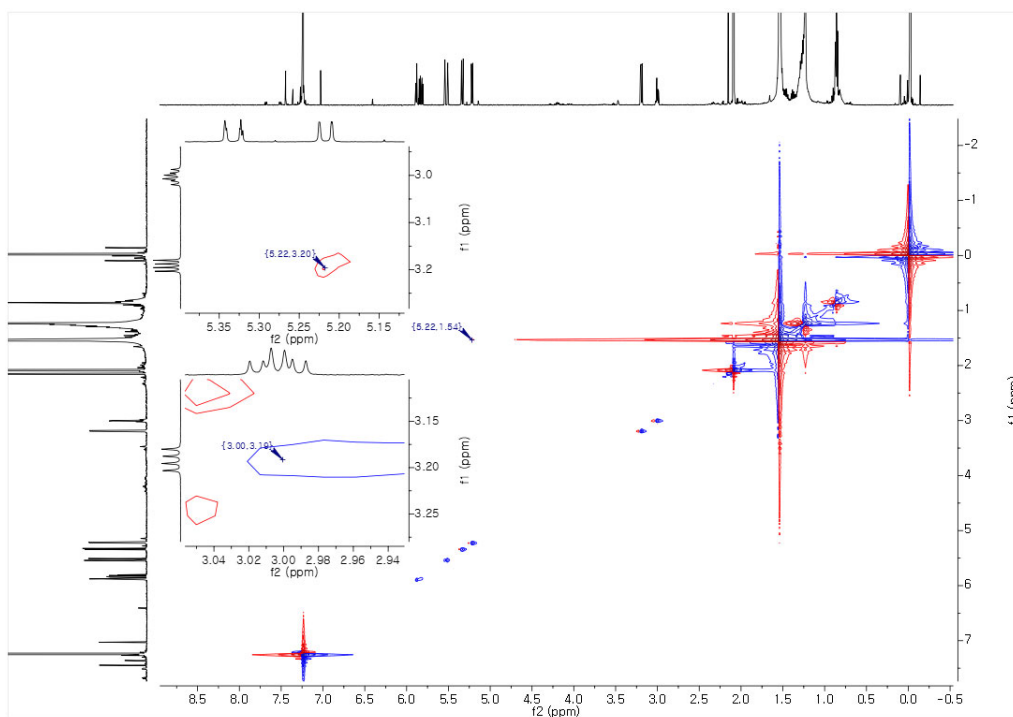

**Figure S14.** HR-DART-MS spectrum of compound **3**

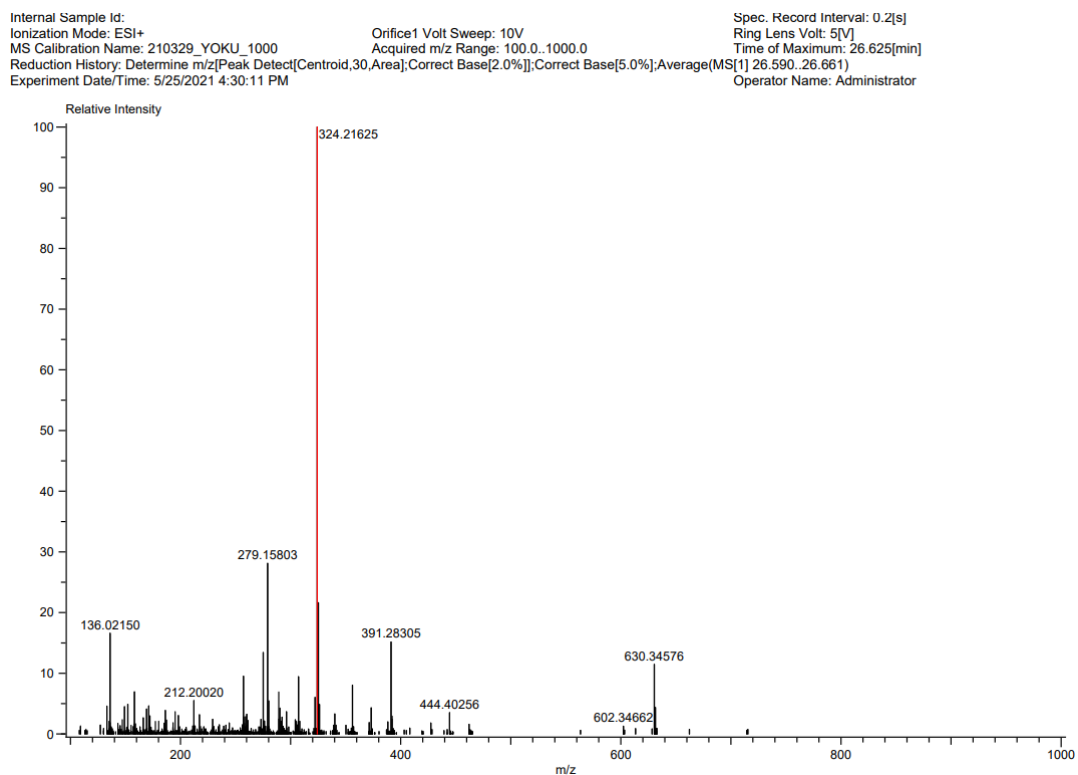

**Figure S15.**  $^1\text{H}$  NMR spectrum of compound **3** (500 MHz, chloroform-*d*)

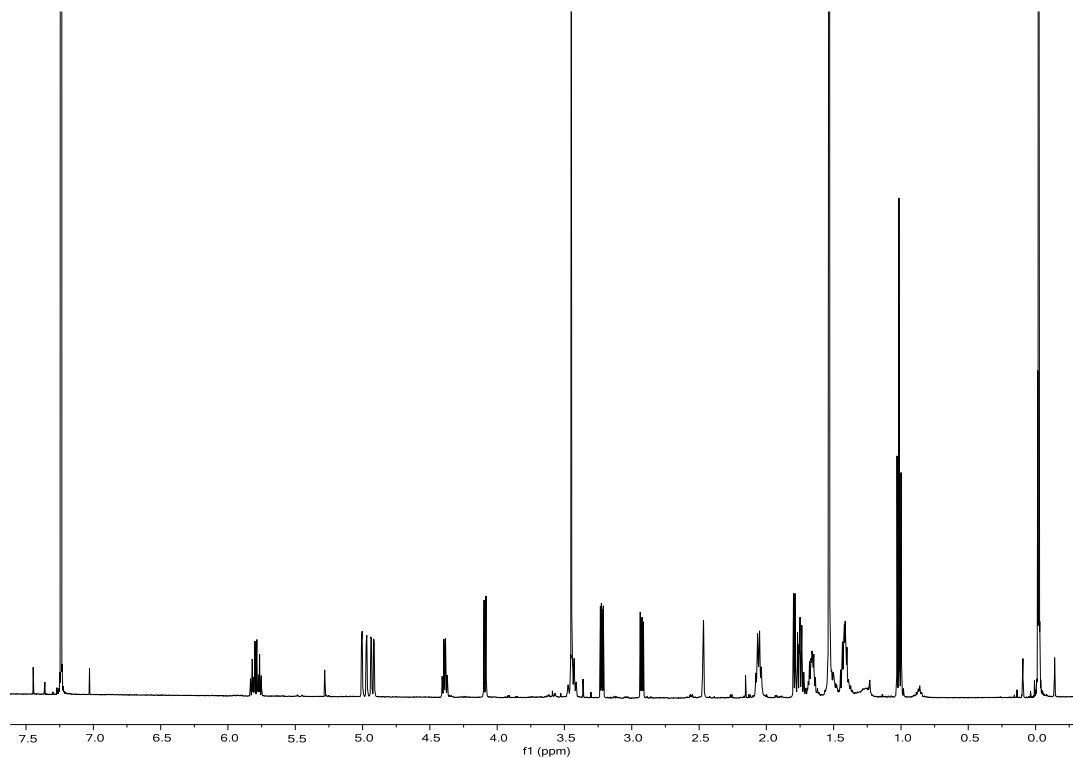

**Figure S16.**  $^{13}\text{C}$  NMR spectrum of compound **3** (125 MHz, chloroform-*d*)

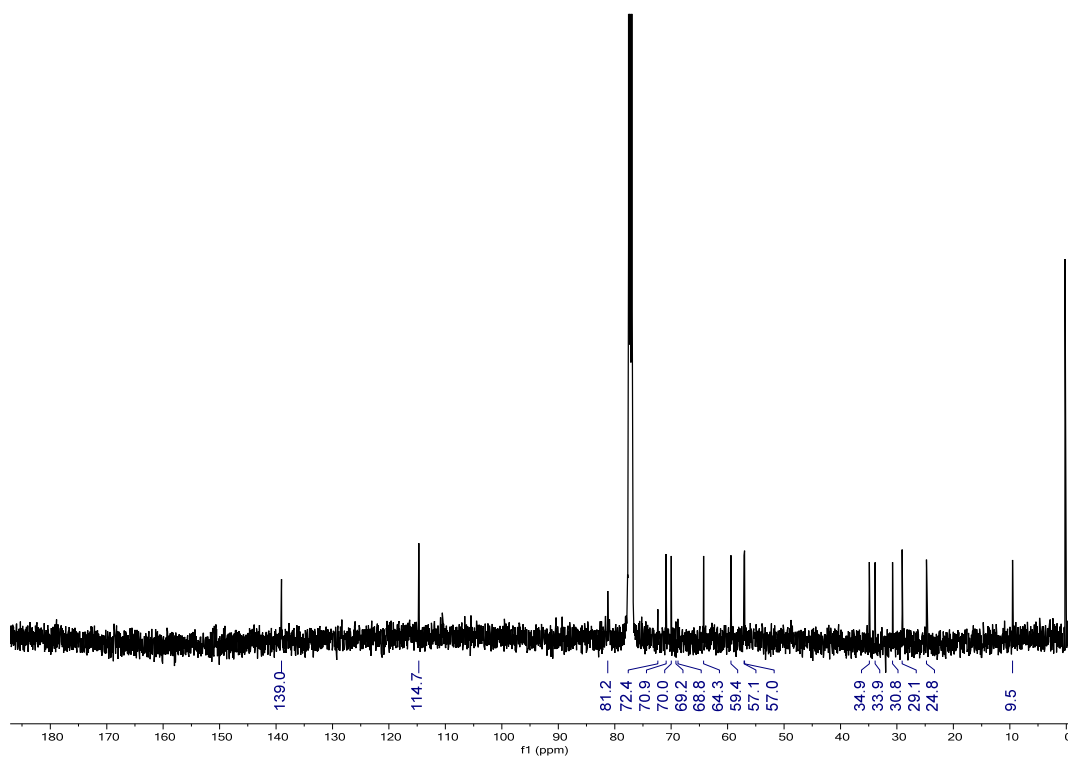

**Figure S17.**  $^1\text{H}$   $^{13}\text{C}$  HSQC spectrum of compound **3**

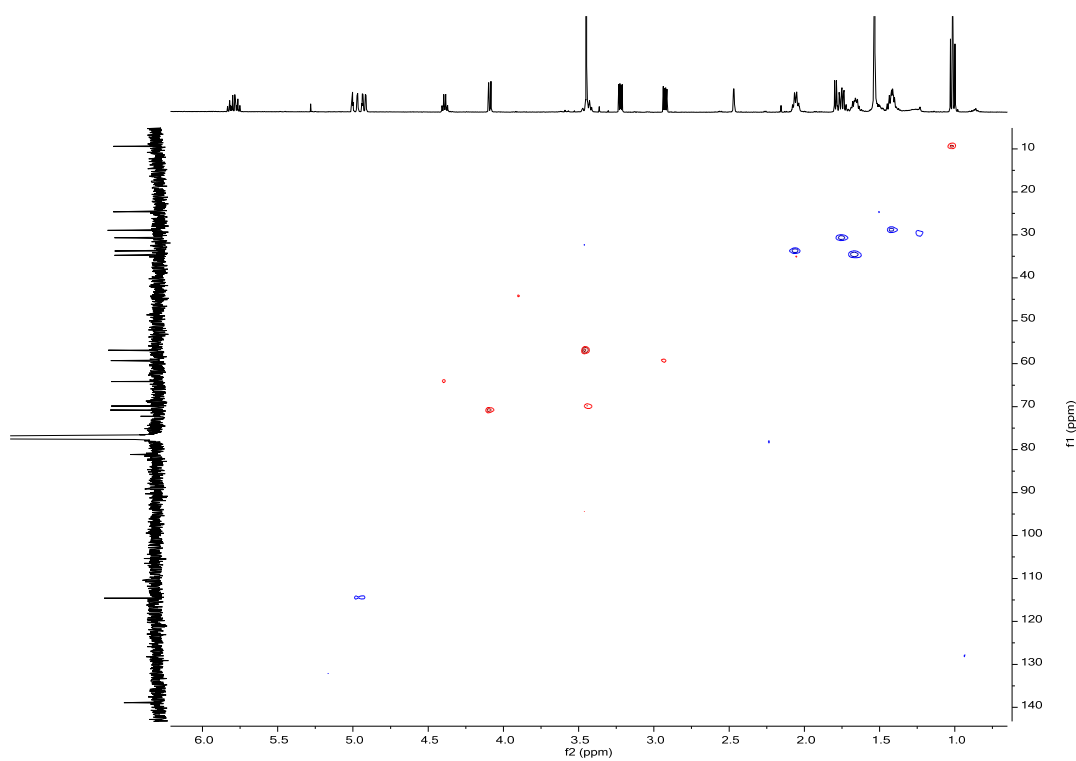

**Figure S18.**  $^1\text{H}$   $^1\text{H}$  COSY spectrum of compound **3**

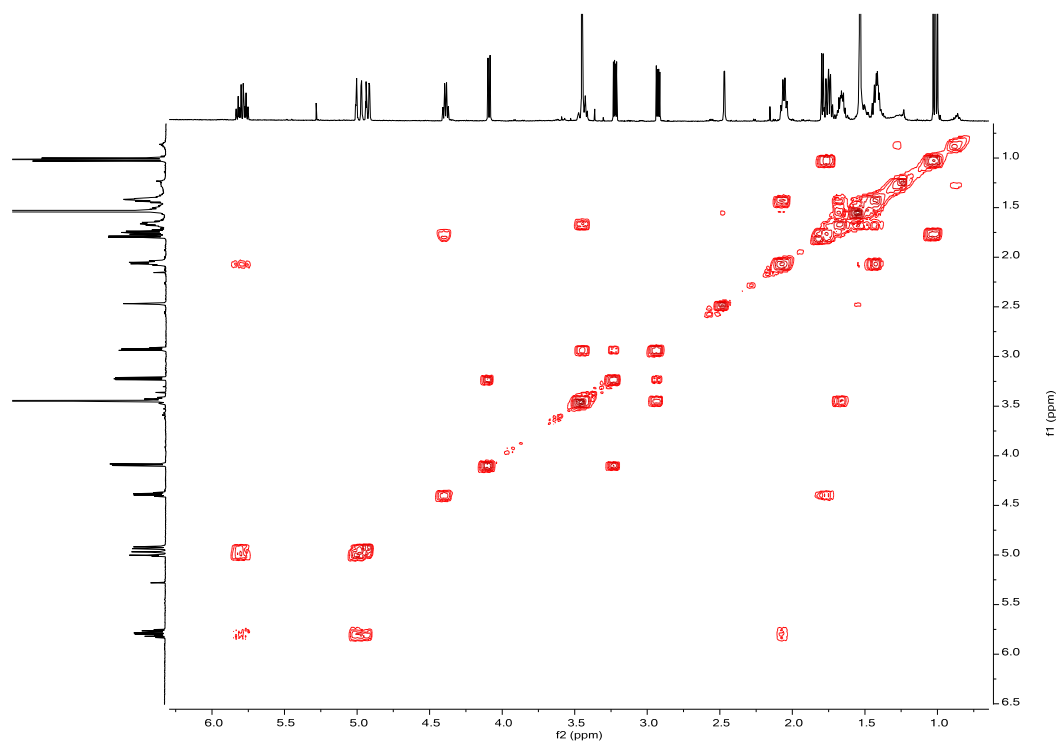

**Figure S19.**  $^1\text{H}$   $^{13}\text{C}$  HMBC spectrum of compound **3**

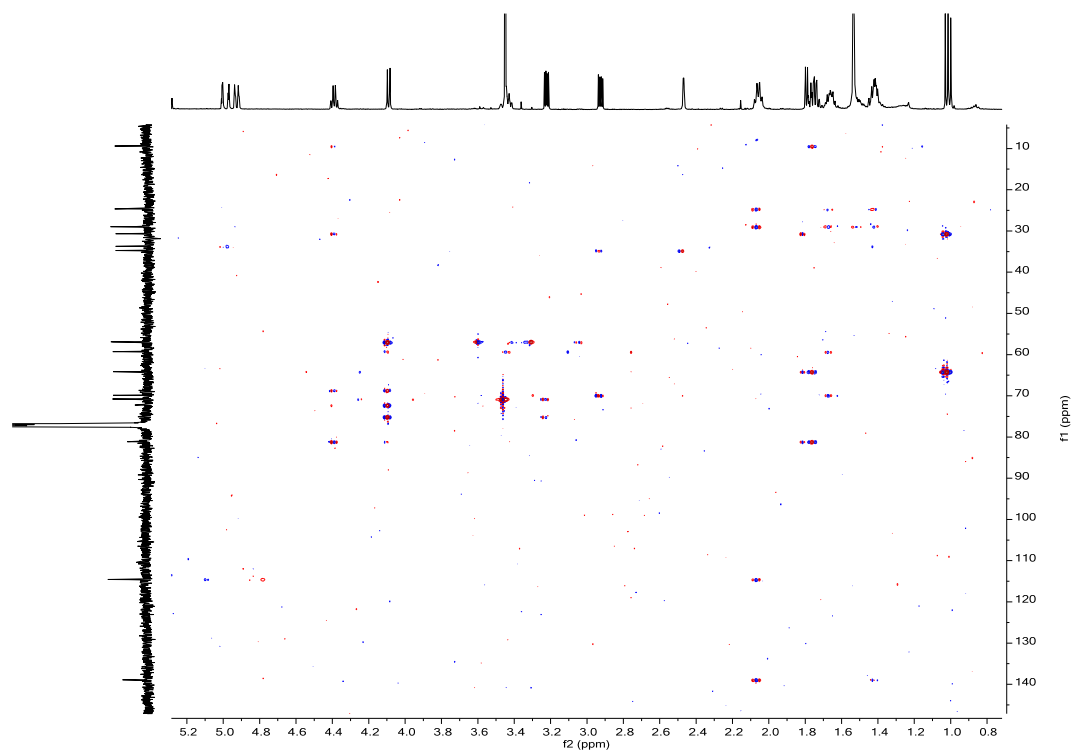

**Figure S20.**  $^1\text{H}$   $^1\text{H}$  NOESY spectrum of compound **3**

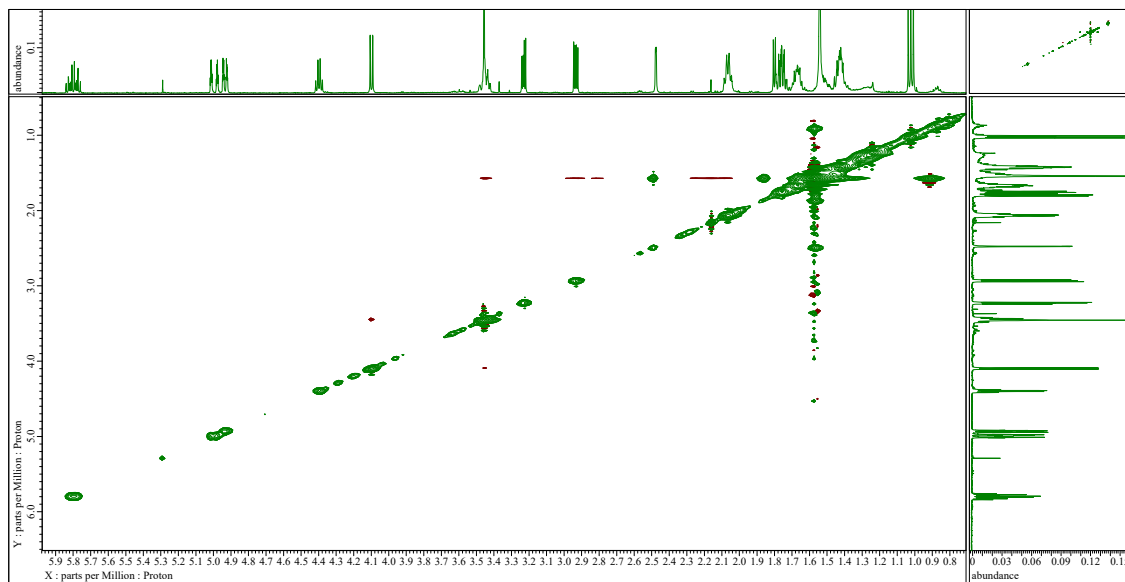

**Figure S21.** HR-DART-MS spectrum of compound **4**

Internal Sample Id:  
Ionization Mode: ESI+  
MS Calibration Name: 210329\_YOKU\_1000  
Reduction History: Determine m/z[Peak Detect[Centroid,30,Area];Correct Base[2.0%];Correct Base[5.0%];Average(MS[1] 31.103, 31.134)  
Experiment Date/Time: 6/22/2021 10:57:22 AM

Orifice1 Volt Sweep: 10V  
Acquired m/z Range: 50.0..1000.0

Spec. Record Interval: 0.2[s]  
Ring Lens Volt: 5[V]  
Time of Maximum: 31.106[min]  
Operator Name: Administrator

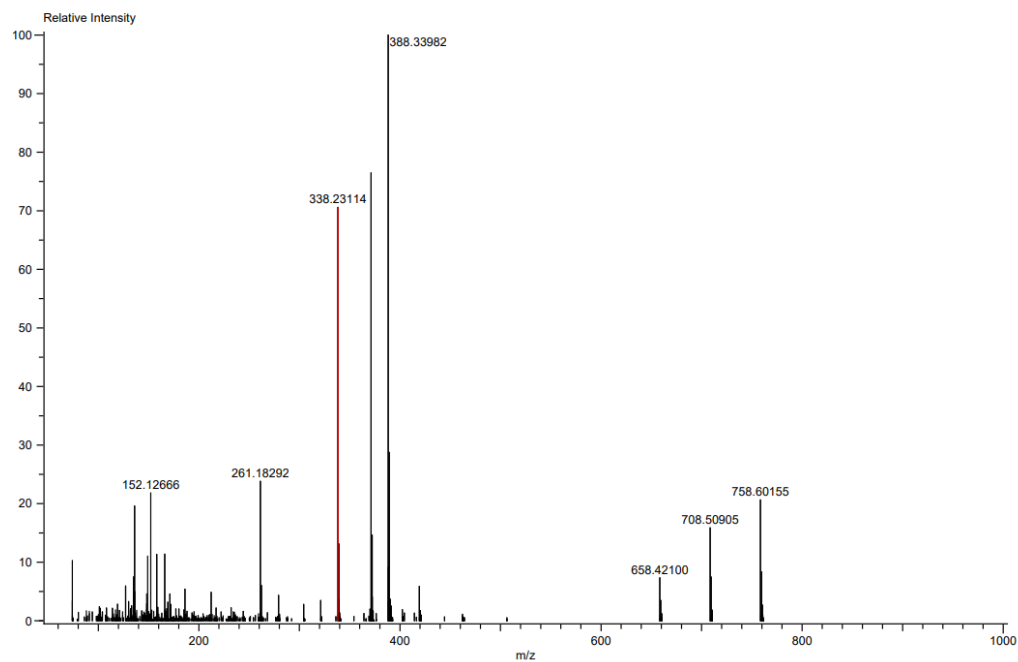

**Figure S22.**  $^1\text{H}$  NMR spectrum of compound **4** (500 MHz, chloroform-*d*)

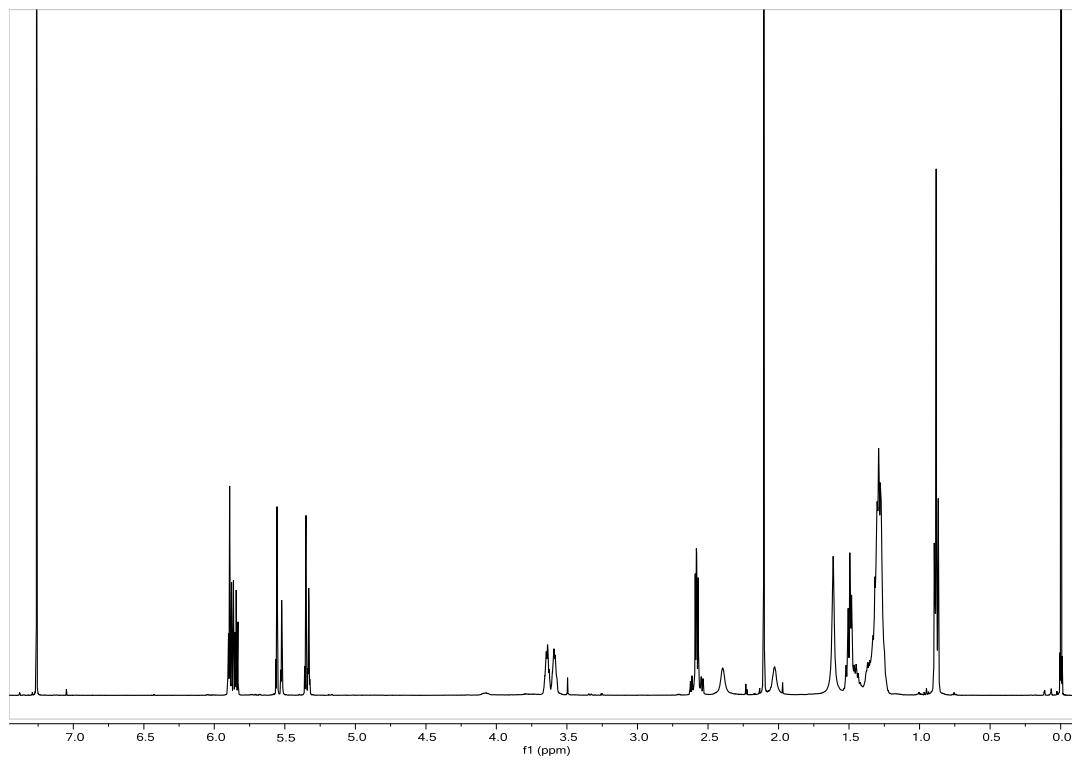

**Figure S23.**  $^{13}\text{C}$  NMR spectrum of compound **4** (125 MHz, chloroform-*d*)

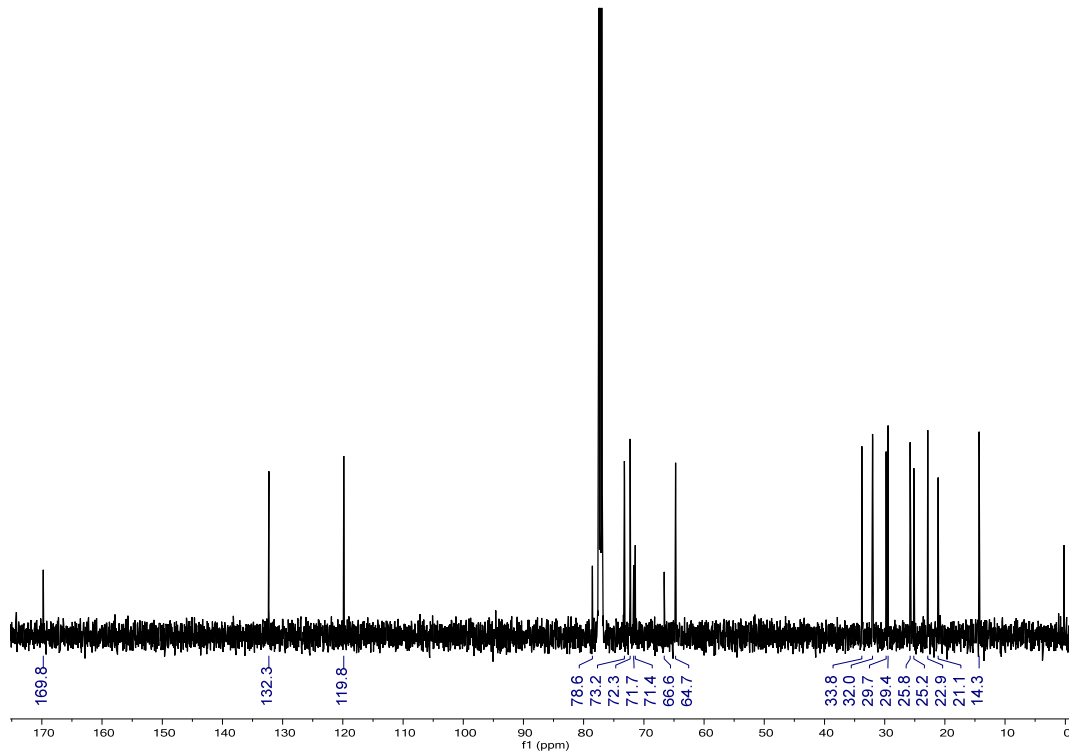

**Figure S24.**  $^1\text{H}$   $^{13}\text{C}$  HSQC spectrum of compound **4**

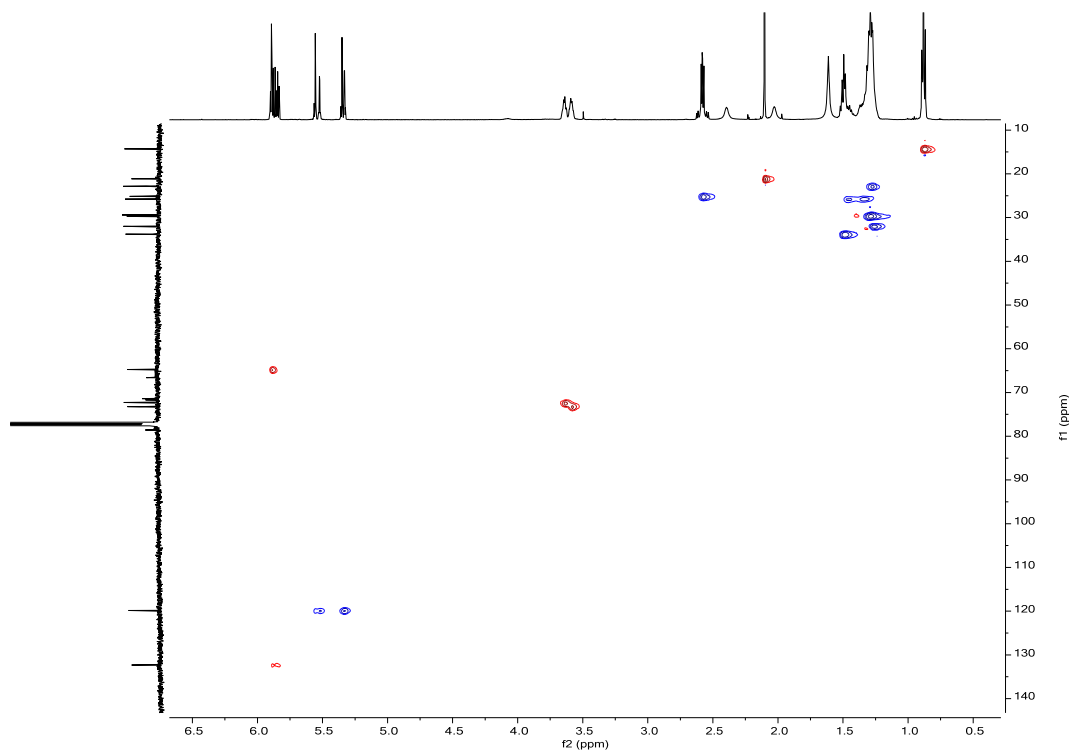

**Figure S25.**  $^1\text{H}$   $^1\text{H}$  COSY spectrum of compound **4**

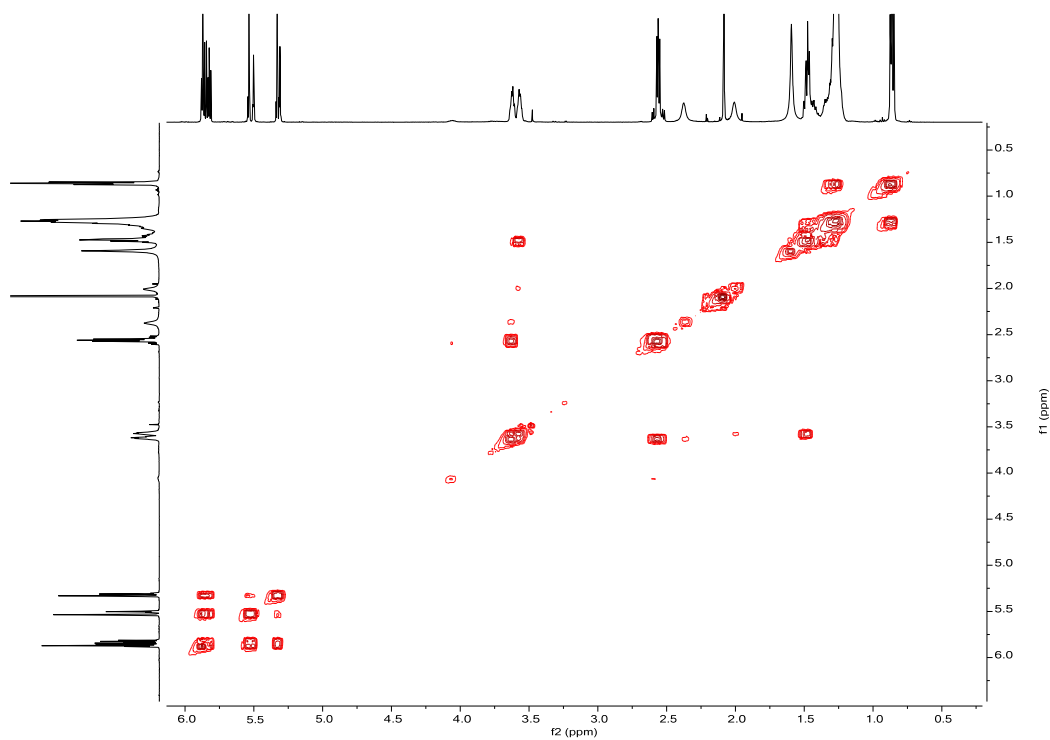

**Figure S26.**  $^1\text{H}$   $^{13}\text{C}$  HMBC spectrum of compound **4**

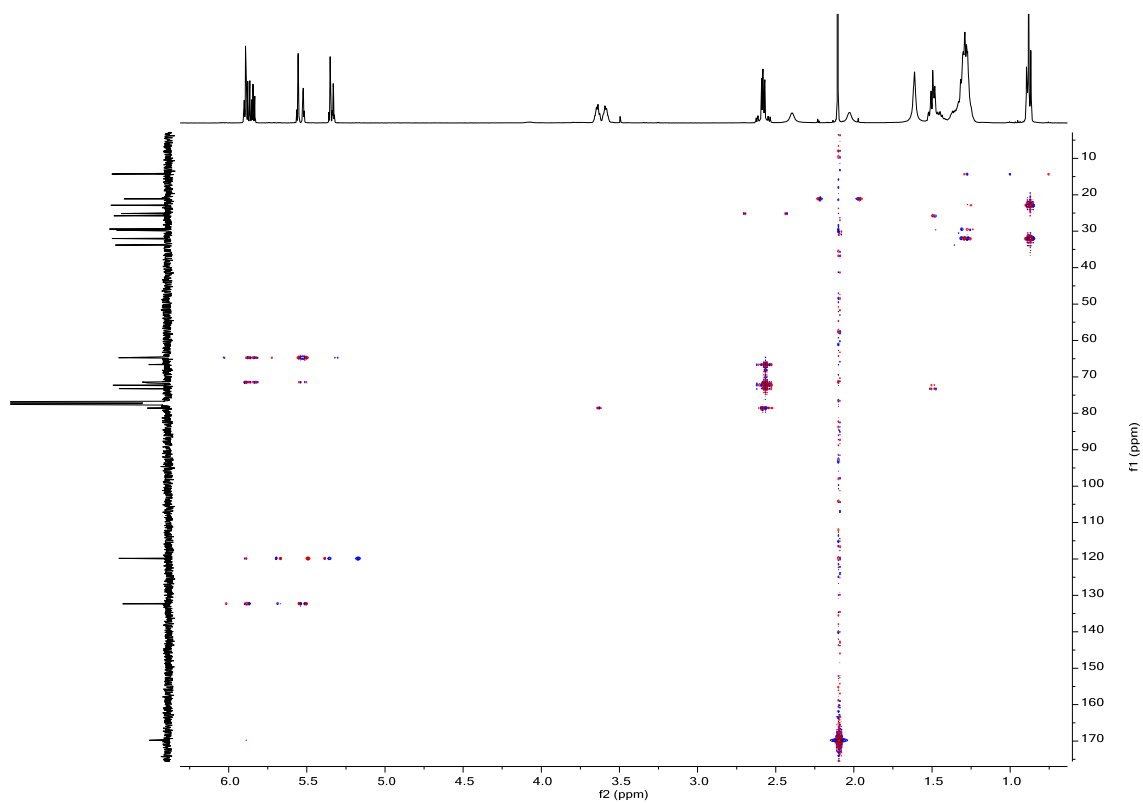

**Figure S27.**  $^1\text{H}$   $^1\text{H}$  NOESY spectrum of compound **4**

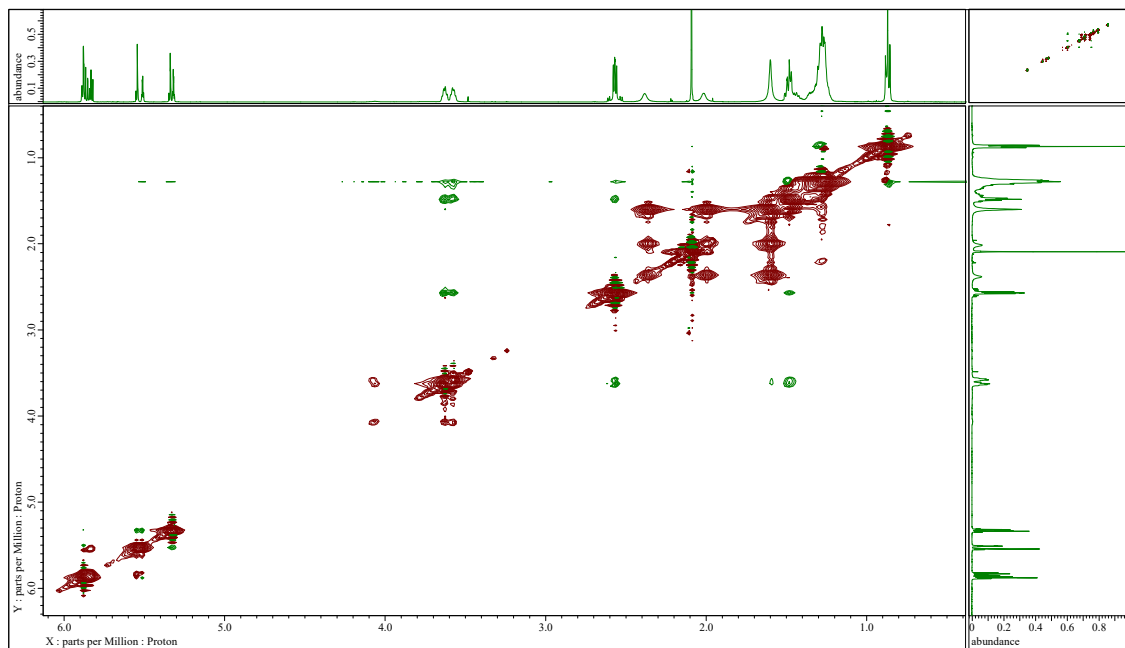

**Figure S28.**  $^1\text{H}$  NMR spectra of compounds **11** and **4a**

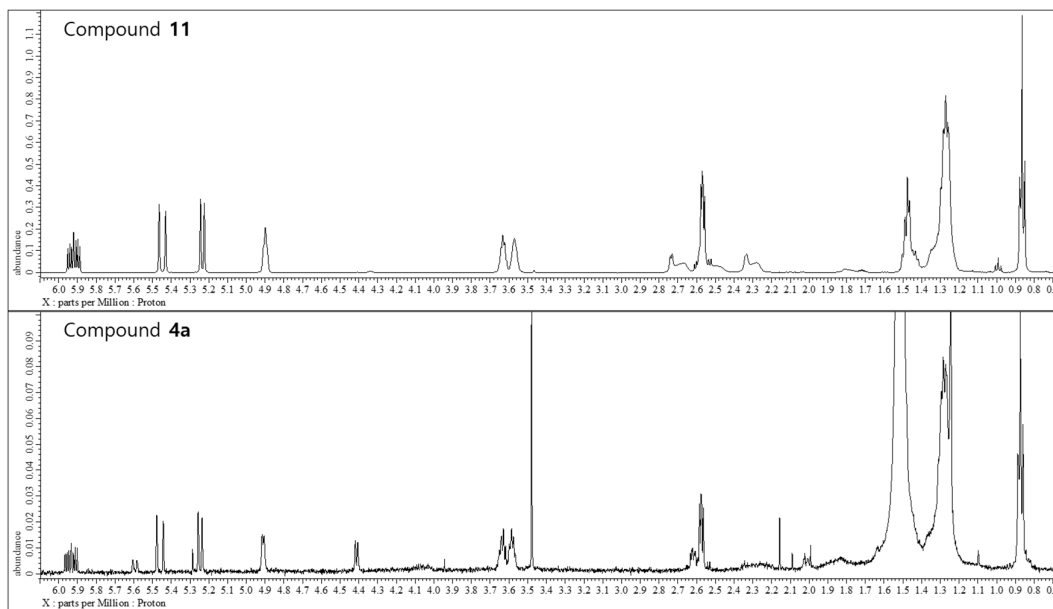

**Figure S29.** The effects of compounds **1–2**, **4**, **6–7**, **9–13**, and **15–16** on cell viability in epithelial ovarian cancer cells A2780

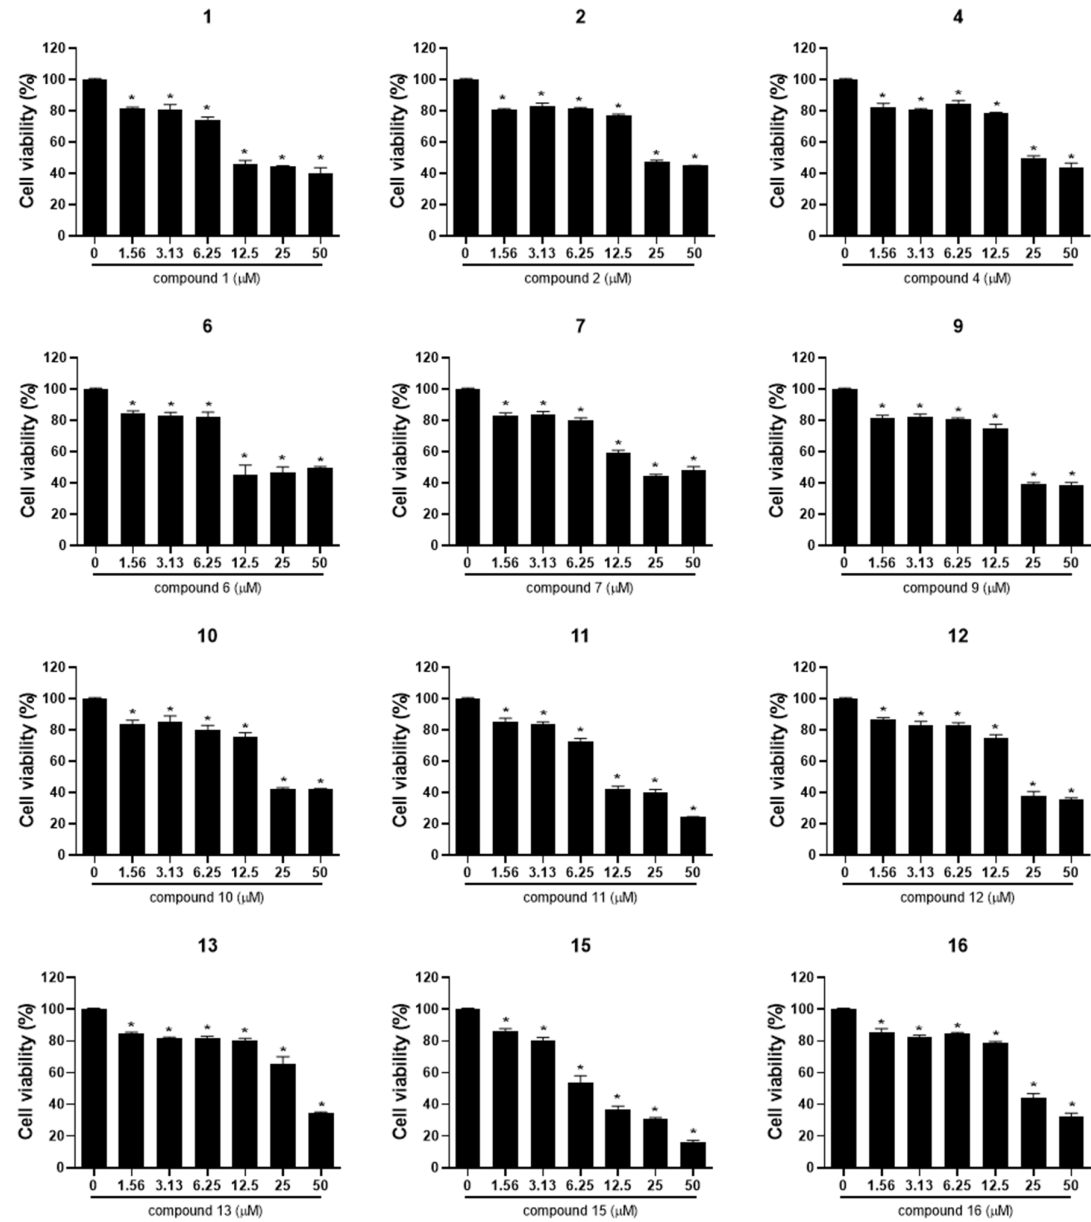

**Figure S30.** The effects of compounds **6**, **11**, and **15** on cell viability in epithelial ovarian cancer cells SKOV3

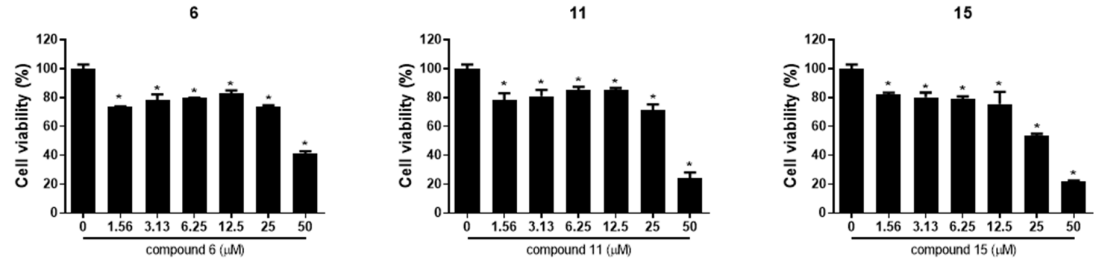

**Table S1.** Experimental and calculated specific rotation data of **1** and **2**

| Ginsenoyne O ( <b>1</b> )                       |                                           |                                             | Ginsenoyne P ( <b>2</b> )                       |                                           |                                             |
|-------------------------------------------------|-------------------------------------------|---------------------------------------------|-------------------------------------------------|-------------------------------------------|---------------------------------------------|
| Configuration                                   | Calculated specific rotation <sup>a</sup> | Experimental specific rotation <sup>b</sup> | Configuration                                   | Calculated specific rotation <sup>a</sup> | Experimental specific rotation <sup>b</sup> |
| 3 <i>S</i> /8 <i>S</i> /9 <i>R</i> /10 <i>R</i> | -12.11                                    | -21.43                                      | 3 <i>S</i> /8 <i>S</i> /9 <i>R</i> /10 <i>R</i> | -20.28                                    | -4.90                                       |
| 3 <i>R</i> /8 <i>S</i> /9 <i>R</i> /10 <i>R</i> | -87.11                                    |                                             | 3 <i>R</i> /8 <i>S</i> /9 <i>R</i> /10 <i>R</i> | -98.10                                    |                                             |
| 3 <i>R</i> /8 <i>R</i> /9 <i>S</i> /10 <i>S</i> | +11.42                                    |                                             | 3 <i>R</i> /8 <i>R</i> /9 <i>S</i> /10 <i>S</i> | +25.34                                    |                                             |
| 3 <i>S</i> /8 <i>R</i> /9 <i>S</i> /10 <i>S</i> | +89.18                                    |                                             | 3 <i>S</i> /8 <i>R</i> /9 <i>S</i> /10 <i>S</i> | +102.61                                   |                                             |

<sup>a</sup> averaged by Boltzmann weight, <sup>b</sup> measured at 589 nm

**Table S2.** The cytotoxicity of compounds **6**, **11**, and **15** isolated from *P. ginseng* in RAW264.7 macrophages

| Compound  | IC <sub>50</sub> ( $\mu$ M) <sup>a</sup> |
|-----------|------------------------------------------|
| <b>6</b>  | 6.28 $\pm$ 0.20                          |
| <b>11</b> | 20.03 $\pm$ 0.53                         |
| <b>15</b> | 18.61 $\pm$ 0.75                         |

<sup>a</sup> IC<sub>50</sub> value is the concentration that results in a 50% reduction in cell number when compared to control cultures.
